# Supplementary material for: Characterization of Type 1 Angiotensin II Receptor Activation Induced Dual-Specificity MAPK Phosphatase Gene Expression Changes in Rat Vascular Smooth Muscle Cells
Source: MDPI journal article supplement (doi:10.3390/cells10123538), 2021-12-15
Supplement: s1 [file s1]

**Supplementary Materials:** The following are available online at [www.mdpi.com/xxx/s1](http://www.mdpi.com/xxx/s1),

**A**

**Smooth muscle  $\alpha$ -actin staining**

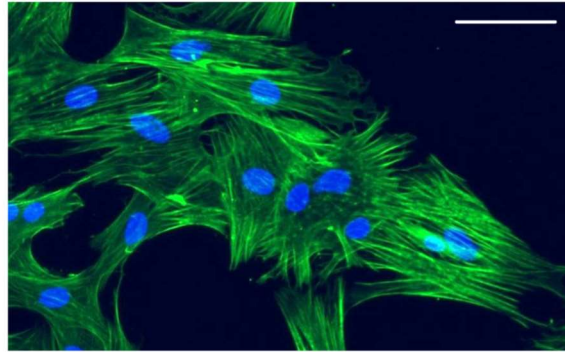

**B**

**ERK-1/2 assay**

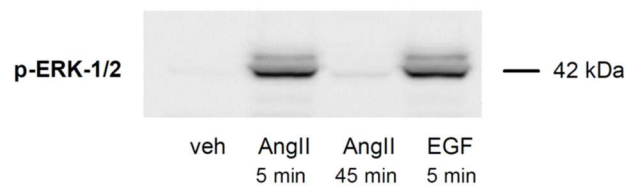

**Supplementary Figure S1. Verification of the basic properties of the isolated VSMCs.** (A) Immunostaining of rat primary VSMC culture with smooth muscle  $\alpha$ -actin (green), the nuclei were stained by DAPI (blue). Bar: 50  $\mu$ m. (B) ERK-1/2 MAPK activation. Rat aortic VSMCs were exposed to vehicle, 100 nM AngII or 3  $\mu$ M TRV120023 (TRV) for 5 min. The western blot is a representative of 3 independent experiments.

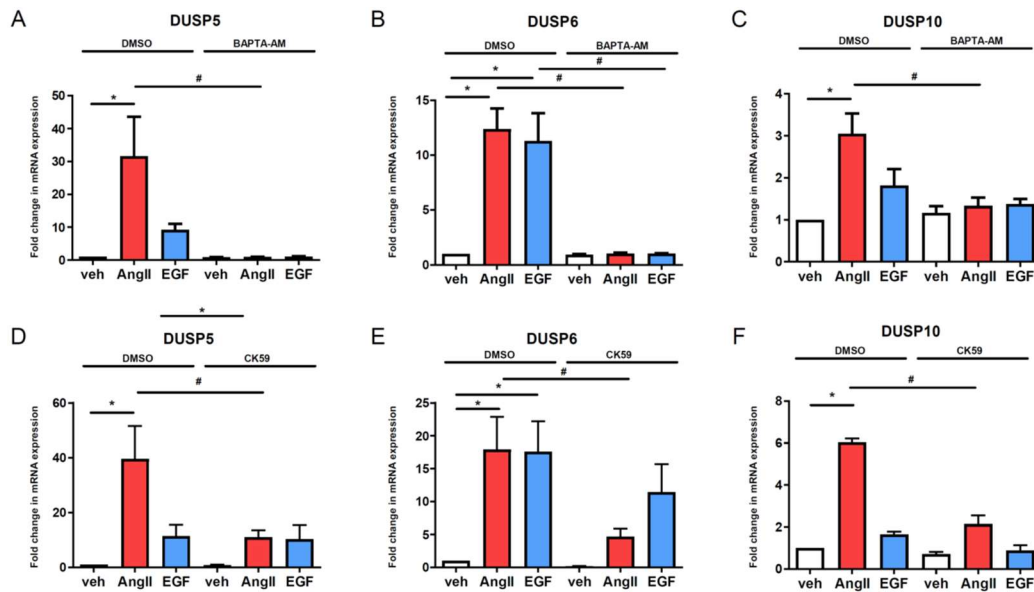

**Supplementary Figure S2. Role of calcium signal in gene expression changes of DUSP isoforms in VSMCs.** Serum depleted VSMCs were incubated with 50  $\mu$ M BAPTA-AM or DMSO as control for 10 minutes (A-C) or pretreated with 50  $\mu$ M CamKII inhibitor, CK59 beside a DMSO treated control group for 30 minutes (D-F), then the cells were exposed to either 100 nM AngII (red columns) or 50 ng/ml EGF (blue columns) or vehicle (white columns) for 2 hours. RNA was isolated from VSMCs, then converted to cDNA. cDNA levels of DUSP5 (A and D), DUSP6 (B and E) and DUSP10 (C and F) were measured by qRT-PCR. Standardization was made against the *GAPDH* housekeeping gene. The mRNA levels were normalized to values of DMSO vehicle samples and expressed as fold change. Mean values  $\pm$  S.E. are shown ( $n = 3-6$ ). Significance was determined with multiple linear regression.  $p < 0.05$  was considered as statistically significant. \*: Statistically significant from vehicle stimulation. #: Statistically significant from DMSO pretreated agonist induced response. The values are from three to six independent experiments.

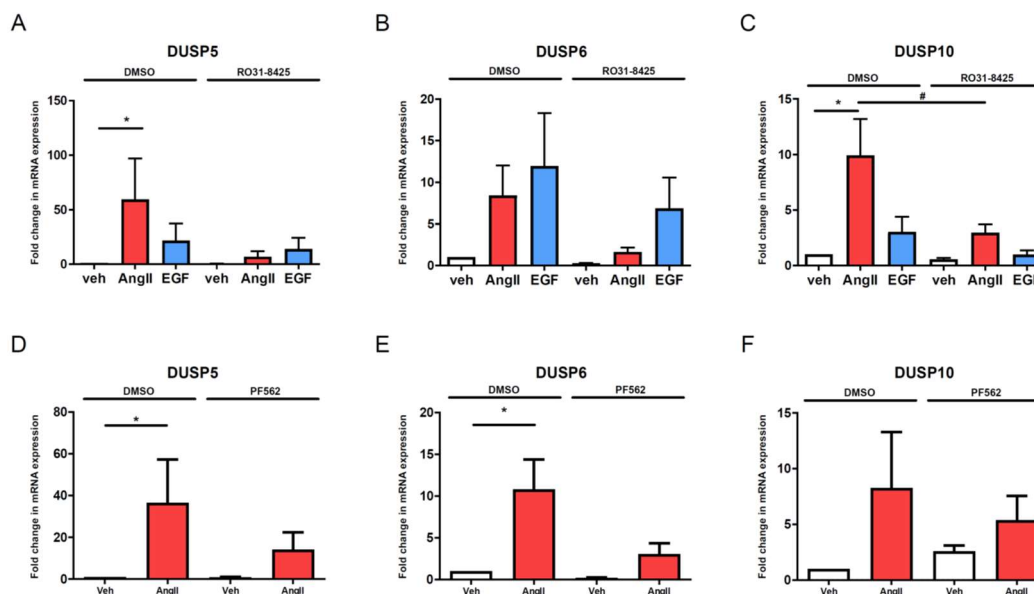

**Supplementary Figure S3. Evaluation of the contribution of PKC signal transduction in the AngII- and EGF-induced gene expression changes of DUSP isoform in VSMCs.** Cells were serum starved and then pretreated with 1  $\mu$ M of PKC inhibitor RO31-8425 or DMSO as control for 10 minutes (A-C),

others were incubated with 1  $\mu$ M PF-562271, Pyk2 inhibitor beside DMSO treated control groups (D-F), then they were exposed to either 100 nM AngII (red columns) or 50 ng/ml EGF (blue columns, A-C) or vehicle (white columns) for 2 hours. RNA was isolated from VSMCs, then converted to cDNA. cDNA levels of DUSP5 (A and D), DUSP6 (B and E) and DUSP10 (C and F) were measured by qRT-PCR. Standardization was made against the *GAPDH* housekeeping gene. The mRNA levels were normalized to values of DMSO vehicle samples and expressed as fold change. Mean values  $\pm$  S.E. are shown ( $n = 3$ ). Significance was determined with multiple linear regression.  $p < 0.05$  was considered as statistically significant. \*: Statistically significant from vehicle stimulation. #: Statistically significant from DMSO pretreated agonist induced response. The values are from three independent experiments.

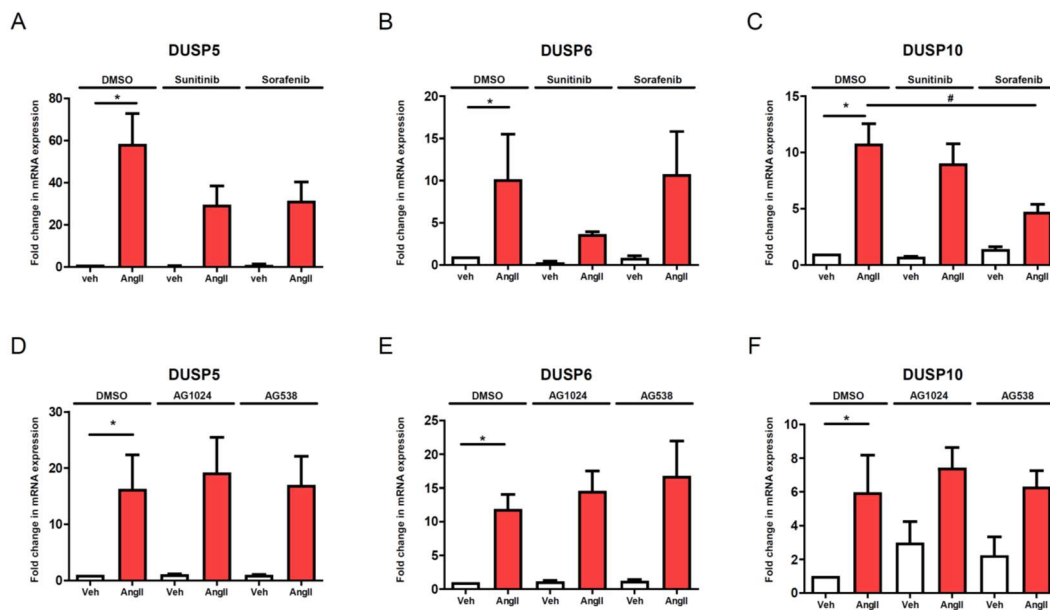

**Supplementary Figure S4. Effect of PDGFR and VEGFR and IGF-1R tyrosine kinase inhibitors on AngII and EGF mediated induction of DUSP expression in vascular smooth muscle cells.** Serum deprived VSMCs were treated with either DMSO or 5  $\mu$ M Sunitinib or 5  $\mu$ M Sorafenib (A-C) or 1-1  $\mu$ M of IGF-1R inhibitors AG1024 and AG538 (D-F) prior to stimulation with either vehicle (white columns) or 100 nM AngII (red columns) or 50 ng/ml EGF (blue columns) for 2 hours. mRNA levels of DUSP5 (A and D), DUSP6 (B and E) and DUSP10 (C and F) were measured by qRT-PCR. Standardization was made against the *GAPDH* housekeeping gene. The mRNA levels were normalized to values of DMSO vehicle samples and expressed as fold change. Mean values  $\pm$  S.E. are shown ( $n = 3-4$ ). Significance was determined with multiple linear regression.  $p < 0.05$  was considered as statistically significant. \*: Statistically significant from vehicle stimulation. #: Statistically significant from DMSO pretreated agonist induced response. The values are from three to four independent experiments.

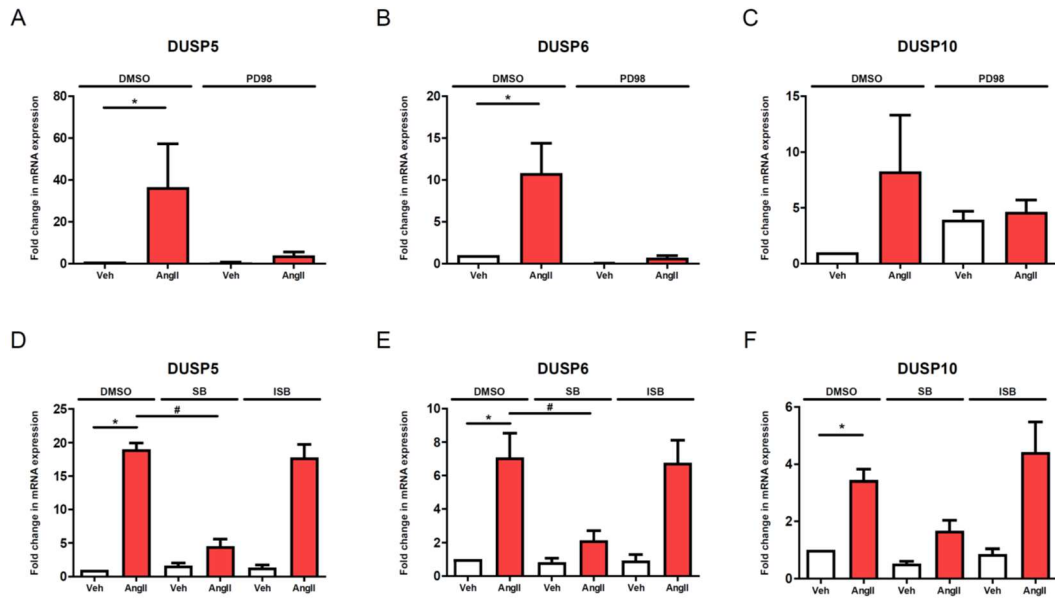

**Supplementary Figure S5. Importance of MAPK cascade activation in AngII mediated upregulation of DUSP isoforms in vascular smooth muscle cells.** Serum starved VSMCs were pretreated with 20  $\mu$ M PD98059 (PD98) MEK inhibitor (A-C) or 50-50  $\mu$ M of p38 MAPK inhibitor SB202190 (SB) or its inactive analog SB202474 (ISB) (D-F) beside DMSO treated control groups for 30 minutes, then stimulated with either vehicle (white columns) or 100 nM AngII (red columns) for 2 hours. mRNA levels of DUSP5 (A and D), DUSP6 (B and E) and DUSP10 (C and F) were measured by qRT-PCR. Standardization was made against the *GAPDH* housekeeping gene. The mRNA levels were normalized to values of DMSO vehicle samples and expressed as fold change. Mean values  $\pm$  S.E. are shown ( $n = 3$ ). Significance was determined with multiple linear regression.  $p < 0.05$  was considered as statistically significant. \*: Statistically significant from vehicle stimulation. #: Statistically significant from DMSO pretreated agonist induced response. The values are from three independent experiments.
